# Supplementary material for: Association between complementary and alternative medicine use and prolonged time to conventional treatment among Thai cancer patients in a tertiary-care hospital
Source: PeerJ journal article supplement (doi:10.7717/peerj.7159), 2019-06-14
Supplement: Article_S2.pdf [file Article_S2.pdf]

## Supplementary contents

### Sample size calculation

The target sample size for the present study was calculated using a formula based on an assumption that 40% of the patients would have used unconventional therapy. The desired precision was 0.05 with a 95% confidence interval. The minimum required sample size was estimated to be 369 patients, and we aimed to recruit at least 400 patients.

$$n = Z^2 \frac{p(1-p)}{d^2}$$

p = assumed prevalence = 0.4

Z = Z value for 95% confidence level) 95% CI = 1.96

d = desired precision = 0.05

n = Sample = 369

### The study area map

The red area represents the nearby provinces and the blue area represents the distant provinces.

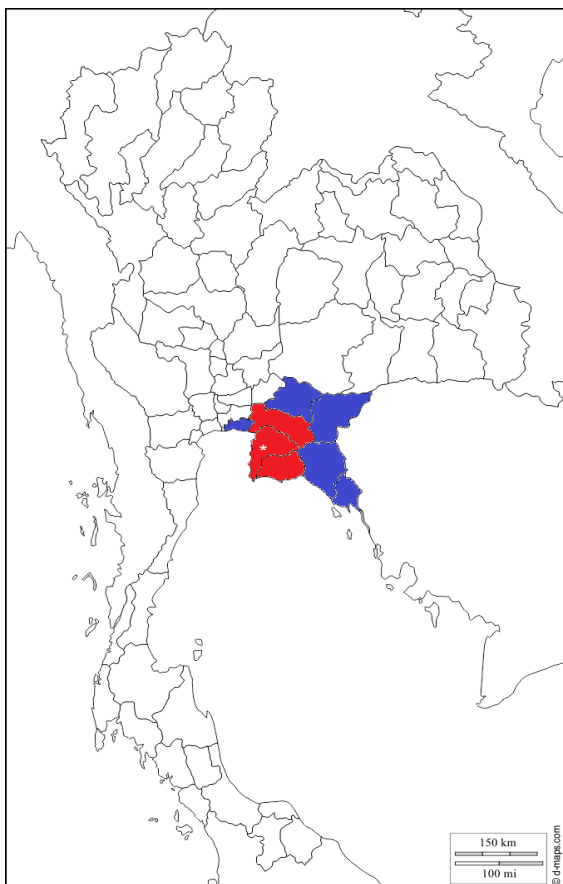

(Modified from the original map; [https://d-maps.com/pays.php?num\\_pay=112&lang=en](https://d-maps.com/pays.php?num_pay=112&lang=en))
