# Supplementary material for: Association between complementary and alternative medicine use and prolonged time to conventional treatment among Thai cancer patients in a tertiary-care hospital
Source: PeerJ. 2019 Jun 14;7:e7159. doi: 10.7717/peerj.7159 (PMC6573806; doi:10.7717/peerj.7159)
Supplement: Supplemental Information 1 [file peerj-07-7159-s001.xls]

## Sheet: raw-data
use of uncon Rx 1=use	use of uncon before	use after	sex0=man 1=woman	age 1<45 2=45-65 3 >65	income 0>300us, 1<300 us dollar	distance 1=far province 0= near province	stage 1 =1-3 ,2=4	wait time (day)	edu 0= secondary or higher, 1 primary or no	cancer 1 H&N 2 colorectal 3 gyne 4 breast 5 others	treatment 1=Sx 2=RT 3=CMT	ssouc 0=non-UC 1=UC	CMT =1 ,Sx=0	RT=1 Sx=0
0	0	0	0	2	0	0	1	88	1	1	1	1	0	0
1	1		0	1	0	0	2	42	0	2	3	0	1
1	1		0	2	0	1	2	146	0	1	1	1	0	0
0	0	0	0	2	1	0	2	45	1	1	3	1	1
0	0	0	1	3	1	1	1	49	1	1	1	1	0	0
1	1		1	2	0	1	1	47	1	1	1	1	0	0
0	0	0	1	3	0	0	1	50	1	1	2	0		1
0	0	0	0	2	1	0	1	160	1	1	1	1	0	0
0	0	0	0	2	0	0	1	31	1	1	1	1	0	0
1		1	0	3	0	0	1	39	1	1	1	0	0	0
1	1		0	2	0	0	1	21	1	1	1	1	0	0
1	1		1	2	1	0	1	109	1	3	2	1		1
1	1		1	2	0	0	1	119	1	3	2	1		1
0	0	0	1	2	0	0	1	35	1	3	2	0		1
1		1	1	2	0	0	1	34	1	2	3	0	1
1	1		0	2	0	0	1	23	0	1	1	0	0	0
1	1		1	2	1	1	1	88	1	3	2	1		1
0	0	0	1	1	0	0	1	92	0	3	2	0		1
1	1		1	1	0	0	2	25	0	9	3	1	1
1	1		0	1	0	0	2	28	1	9	1	0	0	0
1	1		1	3	1	1	1	183	1	1	1	0	0	0
0	0	0	1	1	0	0	1	42	0	1	1	0	0	0
0	0	0	0	1	0	0	2	106	0	9	3	0	1
1	1		0	2	1	0	2	167	1	2	2	1		1
1	1		1	1	0	0	1	161	1	3	2	1		1
1	1		1	3	1	0	1	294	1	3	2	1		1
0	0	0	1	2	0	1	1	45	1	4	2	0		1
0	0	0	1	2	0	0	1	115	1	3	2	1		1
1	1		0	3	0	0	2	25	1	1	3	1	1
1		1	1	1	0	0	1	47	0	4	2	1		1
0	0	0	1	1	0	0	1	171	0	3	2	0		1
0	0	0	0	2	0	0	1	30	0	1	1	0	0	0
1	1		0	2	1	1	2	63	1	1	1	1	0	0
1		1	1	1	0	1	1	29	0	2	3	1	1
1	1		0	2	0	1	2	465	1	1	1	0	0	0
0	0	0	1	2	0	0	1	122	0	3	2	1		1
1		1	1	1	0	0	1	52	0	2	3	0	1
0	0	0	0	3	1	1	1	76	1	1	2	1		1
1	1		0	1	0	1	2	43	0	1	3	0	1
0	0	0	0	3	1	1	1	22	1	1	1	1	0	0
1		1	1	1	0	0	1	22	0	9	2	0		1
1		1	0	1	0	0	1	23	0	2	1	0	0	0
0	0	0	1	2	1	1	1	76	1	1	1	0	0	0
0	0	0	0	2	1	0	1	52	1	1	1	1	0	0
0	0	0	1	2	0	0	1	44	0	4	1	1	0	0
0	0	0	1	2	1	0	1	15	1	4	1	1	0	0
1		1	0	2	1	1	1	37	1	1	1	1	0	0
1	1		0	3	0	1	1	42	0	1	1	1	0	0
0	0	0	1	2	0	1	1	61	0	3	2	0		1
1	1		0	1	0	1	1	21	1	9	2	1		1
1	0	0	0	2	0	0	2	28	1	9	3	1	1
1		1	0	2	0	0	1	36	1	2	3	1	1
0	0	0	0	1	0	0	2	26	1	1	1	0	0	0
0	0	0	0	2	1	1	2	49	1	1	1	1	0	0
1	1		1	2	1	1	2	305	1	1	2	1		1
0	0	0	0	2	1	0	2	90	1	1	2	1		1
0	0	0	1	3	1	0	1	108	1	3	2	1		1
0	0	0	1	2	0	0	1	27	1	2	3	1	1
0	0	0	1	3	1	0	1	93	1	9	3	1	1
1	1		0	1	0	0	1	105	1	2	2	0		1
0	0	0	0	2	1	0	2	29	1	1	1	1	0	0
0	0	0	0	2	1	0	1	26	1	2	3	1	1
0	0	0	1	3	1	1	1	35	1	1	1	1	0	0
0	0	0	1	3	0	0	1	80	1	1	1	0	0	0
0	0	0	1	2	1	0	2	64	1	1	1	1	0	0
0	0	0	0	2	1	0	1	48	1	9	3	1	1
1	1		0	2	1	0	2	29	1	1	2	1		1
0	0	0	1	2	0	1	1	29	1	2	3	1	1
0	0	0	0	2	0	0	1	76	0	1	1	0	0	0
0	0	0	1	3	1	0	1	45	1	2	2	1		1
0	0	0	1	2	0	1	2	30	1	9	3	1	1
1	1		1	1	0	0	2	582	1	3	2	1		1
1		1	1	2	0	0	1	69	1	1	1	1	0	0
1	1		0	3	1	0	2	63	1	1	2	1		1
0	0	0	0	3	1	0	1	3	1	2	3	1	1
1	1		0	3	1	0	2	25	1	1	1	0	0	0
1	1		1	1	0	0	1	17	0	1	1	0	0	0
1	1		0	2	1	1	1	77	1	1	1	1	0	0
0	0	0	1	2	0	0	1	50	1	4	1	1	0	0
0	0	0	1	3	1	0	1	30	1	4	1	1	0	0
1	1		0	2	1	0	2	699	1	2	2	1		1
1	1		0	2	1	0	2	364	1	1	1	1	0	0
0	0	0	0	3	1	1	2	125	1	1	2	1		1
1	1		0	3	1	0	2	114	1	1	1	1	0	0
1	1		0	2	1	0	2	1222	1	1	2	1		1
0	0	0	0	2	1	0	1	23	1	9	3	1	1
0	0	0	1	2	1	0	1	37	1	4	1	1	0	0
1	1		0	3	1	0	2	58	1	1	2	1		1
0	0	0	0	2	1	0	1	35	1	1	2	1		1
0	0	0	0	2	1	0	2	35	1	1	2	1		1
1	1		1	3	1	0	2	359	1	9	3	1	1
1	1		0	3	1	0	2	28	1	9	3	1	1
0	0	0	0	2	1	1	1	84	1	1	2	1		1
1	1		1	2	0	1	2	49	0	1	1	0	0	0
0	0	0	1	2	0	0	1	79	0	3	1	1	0	0
1	1		0	1	0	0	1	25	0	1	3	0	1
1	1		0	3	1	0	2	188	1	2	3	1	1
1		1	0	2	0	1	2	10	0	9	3	0	1
0	0	0	0	2	0	1	1	114	0	1	2	0		1
1		1	1	1	0	0	1	39	0	2	3	0	1
1	1		0	2	0	0	1	57	1	9	3	1	1
1		1	0	2	0	0	2	31	0	2	3	1	1
1		1	0	2	1	0	1	51	0	9	2	0		1
1		1	1	2	1	0	1	62	1	1	1	1	0	0
0	0	0	1	2	0	0	1	14	0	4	1	0	0	0
0	0	0	0	2	0	0	1	108	0	1	2	0		1
1		1	0	2	0	1	1	73	1	1	1	1	0	0
0	0	0	1	2	0	0	1	39	0	3	2	1		1
1	1		0	2	1	0	2	462	1	1	3	1	1
0	0	0	1	3	0	0	1	9	1	1	1	0	0	0
0	0	0	1	3	1	0	1	57	1	1	1	1	0	0
1	1		0	2	0	1	1	75	0	1	2	0		1
0	0	0	0	2	1	0	2	23	1	9	3	1	1
1		1	0	3	1	0	1	34	1	9	3	1	1
0	0	0	1	3	0	0	1	71	1	3	2	1		1
1		1	0	2	0	0	2	14	1	2	3	1	1
0	0	0	0	2	1	1	1	102	0	1	2	1		1
1	1		0	2	0	0	2	24	1	9	3	1	1
1	1		1	2	1	0	2	379	1	3	2	0		1
0	0	0	0	2	1	0	2	305	0	1	2	1		1
1	1		1	1	0	0	1	158	0	3	2	1		1
0	0	0	1	2	1	1	1	529	1	3	2	1		1
1	1		0	2	0	1	2	63	1	1	3	1	1
1	1		0	1	1	0	2	99	1	1	2	1		1
0	0	0	0	3	1	0	1	40	1	2	2	0		1
0	0	0	0	2	0	0	2	127	1	1	2	1		1
1	1		1	1	0	0	1	69	1	3	2	1		1
0	0	0	1	2	1	0	1	139	1	3	2	0		1
0	0	0	0	3	1	1	1	11	1	9	3	1	1
1	1	1	1	2	1	1	1	114	1	3	2	1		1
0	0	0	1	2	0	0	2	50	1	2	3	1	1
1	1		0	2	0	0	2	26	0	2	3	0	1
0	0	0	1	3	0	0	1	36	1	2	2	1		1
0	0	0	1	1	0	0	1	141	0	4	1	0	0	0
0	0	0	1	1	0	0	1	21	0	1	1	0	0	0
0	0	0	0	2	0	0	1	60	1	1	1	1	0	0
1	1		1	1	0	0	1	27	0	4	1	0	0	0
0	0	0	0	1	0	1	1	43	0	2	3	1	1
0	0	0	1	2	0	0	1	19	1	3	3	0	1
1	1		1	1	0	0	1	90	1	3	2	0		1
1	1		1	2	1	1	1	90	1	3	2	1		1
0	0	0	0	3	1	0	1	38	1	1	2	1		1
0	0	0	0	3	0	1	1	53	1	1	1	1	0	0
0	0	0	1	2	1	0	1	58	1	3	2	1		1
1		1	0	3	1	0	2	56	1	9	2	1		1
1		1	0	3	0	0	2	37	0	9	3	1	1
1	1		1	1	1	0	2	114	1	1	2	1		1
0	0	0	0	2	1	1	1	28	1	2	3	1	1
0	0	0	0	2	1	1	1	32	1	2	2	1		1
1		1	1	2	0	0	1	22	1	4	1	1	0	0
0	0	0	1	2	0	0	1	28	1	4	1	1	0	0
0	0	0	1	1	0	0	1	82	0	3	1	0	0	0
1	1		0	2	1	0	2	54	1	1	1	1	0	0
0	0	0	1	2	0	0	2	21	1	1	1	1	0	0
0	0	0	1	3	1	0	2	34	1	9	3	1	1
1	1		0	3	1	0	1	69	1	9	3	1	1
1	1		0	2	0	1	1	35	1	9	3	1	1
0	0	0	1	2	0	0	1	15	1	4	1	0	0	0
1	1		0	3	1	1	2	92	1	1	2	1		1
1	1		1	1	0	0	1	85	0	3	2	0		1
1	1		1	2	1	1	1	96	1	3	2	0		1
0	0	0	0	2	1	0	1	54	1	9	3	1	1
1	1		0	2	0	0	2	42	0	9	3	1	1
1		1	1	2	1	1	1	61	1	1	1	1	0	0
1	1		0	2	0	0	1	2067	0	9	3	0	1
1	1		0	2	1	0	2	279	1	1	1	1	0	0
1	1		0	2	0	0	1	68	0	1	2	1		1
0	0	0	1	2	0	0	2	20	0	9	3	0	1
0	0	0	0	2	0	1	1	127	1	1	2	1		1
0	0	0	0	2	1	0	1	45	1	1	1	1	0	0
0	0	0	0	3	1	0	2	61	1	1	2	1		1
0	0	0	1	1	0	0	1	63	0	3	1	0	0	0
0	0	0	1	2	0	0	1	28	0	4	1	1	0	0
1		1	1	3	0	1	1	10	0	4	1	0	0	0
0	0	0	0	2	0	0	1	66	1	1	1	1	0	0
0	0	0	0	3	1	0	2	17	1	1	1	1	0	0
0	0	0	0	2	1	0	1	27	1	1	1	1	0	0
1		1	0	2	0	0	1	35	1	9	2	0		1
0	0	0	0	2	0	0	1	27	0	2	3	1	1
0	0	0	1	2	0	1	2	42	1	1	2	0		1
0	0	0	0	3	1	0	1	96	1	9	2	1		1
1	1		0	3	1	0	1	69	1	9	3	1	1
1	1		1	1	0	0	2	80	0	3	2	1		1
1	1		0	1	0	0	2	77	0	1	3	1	1
1	1		1	2	1	0	1	88	1	3	2	1		1
0	0	0	1	2	1	1	1	29	1	3	3	1	1
1		1	1	2	1	0	1	97	1	3	2	1		1
0	0	0	0	3	1	0	2	97	1	9	3	1	1
0	0	0	1	1	0	1	1	45	1	3	2	1		1
1		1	1	2	0	1	1	98	1	3	2	1		1
1	1		0	2	0	1	1	51	1	1	1	1	0	0
0	0	0	0	2	0	0	2	29	0	1	1	0	0	0
1	1		1	1	0	1	1	42	0	1	1	1	0	0
1	1		0	1	0	0	2	239	0	1	1	0	0	0
1	1		0	2	1	0	2	36	1	1	1	1	0	0
1	1		1	2	1	0	1	37	1	1	1	0	0	0
0	0	0	0	2	1	0	2	143	1	1	1	1	0	0
0	0	0	1	2	1	0	1	45	1	4	1	1	0	0
0	0	0	1	2	1	0	1	20	1	4	1	0	0	0
1	1		1	2	0	0	1	174	0	2	3	1	1
1	1		0	2	1	0	2	79	1	9	3	1	1
0	0	0	1	1	1	1	1	45	0	1	1	1	0	0
0	0	0	0	3	0	0	1	45	1	9	3	1	1
0	0	0	1	2	1	0	1	38	0	4	3	1	1
0	0	0	0	2	0	0	1	36	1	2	2	1		1
0	0	0	1	2	1	0	1	39	1	1	1	0	0	0
0	0	0	1	2	1	0	1	55	1	3	3	1	1
0	0	0	1	1	1	0	1	86	1	3	2	1		1
0	0	0	0	3	1	0	1	27	1	2	3	1	1
1	1		0	3	1	1	1	85	1	2	2	1		1
0	0	0	0	2	0	0	2	90	1	9	3	0	1
1	1		1	1	0	0	1	66	0	3	3	1	1
1	1		0	2	1	0	2	35	1	1	1	1	0	0
0	0	0	0	2	1	0	2	20	1	1	1	1	0	0
1	1		0	2	1	0	1	210	1	2	3	1	1
1	1		1	1	0	0	1	77	1	3	2	1		1
0	0	0	1	3	1	0	1	36	1	3	2	1		1
0	0	0	1	2	1	0	1	48	1	9	3	1	1
0	0	0	1	2	1	1	1	76	1	3	2	1		1
1	1		0	1	0	1	2	49	0	1	1	1	0	0
0	0	0	0	2	1	1	2	71	1	1	2	1		1
1	1		0	2	0	0	1	114	1	1	2	0		1
1		1	0	1	0	1	2	90	1	1	2	1		1
0	0	0	0	1	0	0	2	79	0	1	2	0		1
0	0	0	0	2	0	0	2	53	0	1	2	1		1
0	0	0	0	1	0	0	2	45	0	1	2	0		1
1	1		0	2	0	0	2	63	1	1	2	1		1
0	0	0	1	1	1	0	2	92	1	1	2	1		1
1	1		1	1	0	0	1	100	0	3	2	0		1
1	1		1	2	1	0	1	25	1	2	3	1	1
0	0	0	0	2	1	0	1	28	1	1	1	1	0	0
1		1	0	2	0	0	1	39	1	2	3	1	1
0	0	0	0	1	0	0	1	22	0	2	3	0	1
1	1		1	2	1	1	1	175	1	4	3	1	1
0	0	0	1	2	0	0	1	33	1	4	1	1	0	0
0	0	0	0	3	1	0	2	46	1	1	2	1		1
0	0	0	1	1	0	0	1	61	1	3	2	0		1
1	1		0	2	0	1	2	375	0	2	3	1	1
0	0	0	1	2	0	0	1	36	1	4	1	1	0	0
0	0	0	1	2	1	0	2	79	1	2	3	1	1
0	0	0	1	2	1	0	1	27	0	4	1	1	0	0
0	0	0	1	2	1	0	1	62	1	4	1	1	0	0
1	1		0	2	1	0	2	63	1	9	3	1	1
0	0	0	1	1	0	0	1	36	1	9	3	0	1
1	1		1	1	1	0	1	48	1	2	3	0	1
1	1		1	3	1	1	1	56	1	4	1	1	0	0
1	1		0	2	1	0	2	42	1	1	1	1	0	0
0	0	0	1	2	1	0	1	42	1	4	1	1	0	0
0	0	0	1	1	0	1	2	313	1	3	2	0		1
0	0	0	0	2	1	0	1	65	1	9	3	0	1
0	0	0	0	1	0	0	2	90	1	1	2	1		1
0	0	0	1	1	0	0	1	57	0	3	1	0	0	0
1	1		1	1	1	0	1	91	0	3	2	1		1
0	0	0	1	2	0	0	1	30	1	2	3	0	1
1		1	1	2	1	0	1	57	1	2	2	1		1
0	0	0	1	1	1	0	1	102	0	3	2	0		1
1	1		1	2	0	0	2	325	0	4	3	0	1
0	0	0	1	3	1	1	1	31	1	3	2	1
0	0	0	0	3	1	1	1	22	1	2	3	0	1
0	0	0	1	2	1	0	2	42	1	1	2	1		1
1	1		0	2	1	0	2	94	1	1	1	0	0	0
1	1		0	3	1	1	2	206	1	1	2	1		1
1	1		1	2	1	1	1	44	1	1	1	1	0	0
0	0	0	0	3	1	0	1	76	1	1	2	1		1
0	0	0	1	2	0	0	1	60	1	1	2	0		1
0	0	0	0	1	0	0	2	63	1	1	2	0		1
1		1	0	2	1	0	1	43	1	2	3	1	1
1	1		0	2	1	0	2	111	1	2	2	1		1
0	0	0	1	3	1	1	1	73	1	4	3	0	1
0	0	0	1	1	0	0	1	40	0	4	1	1	0	0
0	0	0	0	2	0	0	2	24	1	1	1	1	0	0
1		1	0	1	1	0	1	39	1	2	3	0	1
1		1	1	2	0	0	1	29	1	4	1	0	0	0
0	0	0	1	1	0	1	1	81	0	3	2	1		1
0	0	0	0	3	1	0	2	29	1	2	3	1	1
1	1		0	2	0	0	1	260	1	1	1	0	0	0
0	0	0	0	1	1	0	1	38	1	2	3	0	1
0	0	0	1	2	1	0	1	37	1	4	1	1	0	0
1	1		0	1	0	0	1	45	0	9	1	0	0	0
1	1		1	3	1	1	1	156	1	1	1	1	0	0
1	1		0	3	1	1	1	60	1	1	1	1	0	0
0	0	0	0	3	1	1	2	37	1	2	2	1		1
1	1		1	3	1	0	1	43	1	2	3	1	1
0	0	0	0	3	1	1	1	41	1	9	2	1		1
1		1	0	3	0	0	2	34	1	2	3	1	1
1		1	0	3	0	1	2	373	1	1	3	1	1
1		1	0	2	0	0	1	36	1	1	1	1	0	0
0	0	0	0	2	1	0	2	34	1	2	3	1	1
0	0	0	1	3	0	0	1	62	1	3	2	1		1
0	0	0	1	2	1	1	1	49	1	4	2	1		1
1		1	0	2	1	0	2	62	1	1	2	1		1
1	1		0	3	1	0	1	121	1	1	2	1		1
0	0	0	1	2	0	0	1	33	1	2	3	1	1
1		1	0	2	1	1	1	20	0	9	2	1		1
1	1		0	3	0	0	1	39	0	1	1	1	0	0
0	0	0	1	2	0	0	1	29	1	1	1	0	0	0
1	1		0	2	0	0	2	329	0	1	2	0		1
0	0	0	0	3	1	0	1	57	1	1	2	1		1
0	0	0	0	2	1	0	1	43	1	2	3	1	1
0	0	0	1	1	1	1	1	37	1	4	2	1		1
0	0	0	1	3	1	1	1	29	1	1	1	1	0	0
1	1		0	2	1	1	1	83	1	9	2	1		1
0	0	0	0	3	1	1	2	51	1	1	1	0	0	0
0	0	0	1	2	1	0	2	59	1	3	3	1	1
1		1	1	2	0	1	1	107	1	3	2	1		1
0	0	0	1	1	0	1	1	20	0	4	3	1	1
1	1		1	1	0	1	1	208	0	3	2	0		1
1	1		0	2	1	0	2	247	1	1	2	1		1
0	0	0	0	2	1	0	1	376	0	9	3	1	1
0	0	0	0	1	0	0	2	35	0	1	2	0		1
1		1	0	1	1	1	2	91	0	1	2	0		1
0	0	0	1	1	0	1	2	56	0	1	2	1
1		1	0	2	0	1	2	45	1	1	1	1	0	0
0	0	0	1	2	1	1	2	36	1	3	2	1		1
0	0	0	1	3	1	1	1	9	1	1	1	1	0	0
1		1	1	2	1	0	1	39	1	4	1	0	0	0
1	1		0	2	1	0	1	69	1	2	2	1		1
0	0	0	1	2	1	1	1	27	1	2	2	1		1
0	0	0	0	1	0	0	1	83	0	9	1	0	0	0
0	0	0	1	2	1	0	1	29	1	4	1	1	0	0
0	0	0	0	2	1	0	2	38	1	2	3	1	1
0	0	0	1	3	1	0	1	30	1	9	1	1	0	0
1	1		0	3	0	0	2	40	1	9	1	1	0	0
0	0	0	1	2	1	0	1	31	1	4	1	1	0	0
0	0	0	1	1	0	1	1	65	1	3	2	1		1
0	0	0	0	3	0	1	2	49	1	1	2	1		1
1		1	0	1	0	0	2	30	1	1	2	1		1
0	0	0	0	2	0	0	2	62	1	1	2	1		1
0	0	0	1	2	0	0	1	29	0	4	1	0	0	0
0	0	0	1	3	1	1	1	71	1	4	2	1		1
0	0	0	0	2	1	0	1	33	1	9	3	1	1
0	0	0	0	3	1	1	1	54	1	2	2	1		1
0	0	0	1	1	0	0	1	75	0	3	2	0		1
1		1	1	2	1	0	1	41	1	1	1	1	0	0
1	1		0	2	0	0	2	121	0	1	2	0		1
1	1		0	1	0	0	2	106	1	9	3	1	1
1	1		0	2	0	0	1	64	0	2	3	1	1
1	1		0	3	1	0	2	128	1	9	3	1	1
1	1		1	1	1	1	1	385	1	3	2	1		1
1	1		1	2	1	0	1	43	1	3	2	0		1
0	0	0	1	1	0	0	1	88	0	4	2	0
1	1		1	1	0	0	1	211	0	4	1	1	0	0
1	1		0	2	0	0	2	41	1	1	1	1	0	0
0	0	0	1	1	0	1	1	28	0	4	1	0	0	0
1	1		0	2	1	0	2	28	1	1	1	1	0	0
1		1	1	2	0	0	2	100	1	3	2	1		1
1	1		0	2	0	0	2	43	1	9	3	0	1
1	1		1	2	0	0	2	30	0	3	3	0	1
0	0	0	1	2	0	1	2	12	0	4	3	0	1
0	0	0	0	2	1	0	1	28	1	9	3	1	1
0	0	0	1	3	1	0	1	35	1	1	1	0	0	0
1	1		1	1	0	1	1	30	0	4	2	1		1
0	0	0	1	2	1	1	1	14	0	4	3	1	1
0	0	0	1	3	0	1	1	151	1	1	1	1	0	0
0	0	0	1	2	1	0	1	23	1	4	1	1	0	0
0	0	0	0	2	1	0	2	131	1	9	2	1		1
0	0	0	0	1	0	0	2	38	0	1	1	0	0	0
1	1		1	3	1	1	2	581	1	3	2	0		1
1		1	0	2	1	0	2	59	1	2	2	1		1
0	0	0	0	2	1	0	2	33	1	1	1	0	0	0
1	1		1	2	0	0	1	30	1	1	1	0	0	0
0	0	0	0	2	1	1	1	44	1	9	2	1		1
1	1		1	1	1	0	1	151	1	3	2	1		1
0	0	0	0	2	0	0	2	34	1	2	3	0	1
0	0	0	1	2	1	1	1	28	1	4	2	1		1
1	1		0	2	0	0	1	59	0	9	3	0	1
1	1		1	1	1	0	1	136	1	4	2	1		1
0	0	0	0	2	1	0	1	40	1	9	3	1	1
1	1		0	1	0	1	2	71	1	1	2	1		1
0	0	0	0	1	0	0	1	84	0	1	2	0		1
1	1		1	3	1	1	2	315	1	1	1	1	0	0
1		1	0	3	0	0	2	62	0	1	1	1	0	0
1	1		1	2	1	0	1	1085	1	3	2	1		1
0	0	0	0	2	0	1	1	51	1	9	3	1	1
1		1	0	1	1	1	1	38	1	9	2	1		1
0	0	0	0	2	0	1	2	28	0	9	3	0	1
1	1		1	3	0	0	1	85	1	3	2	0		1
0	0	0	1	2	0	0	1	61	1	3	2	1		1
0	0	0	0	2	0	0	1	46	1	1	1	0	0	0
0	0	0	0	2	0	0	2	33	1	1	1	1	0	0
0	0	0	1	3	1	0	1	43	1	2	3	1	1
0	0	0	1	2	1	1	1	NA	1	2	2	1		1
0	0	0	1	2	0	0	1	42	1	2	3	1	1
0	0	0	1	3	1	0	2	36	1	9	3	1	1
0	0	0	1	1	0	0	1	54	0	4	1	1	0	0
1	1		0	2	0	0	1	65	1	2	3	1	1
0	0	0	1	2	1	1	1	117	1	3	1	1	0	0
1		1	1	3	0	0	1	35	0	4	1	0	0	0
0	0	0	1	2	1	0	1	56	1	2	2	1		1
0	0	0	1	3	1	1	1	67	1	1	1	1	0	0
0	0	0	0	2	1	0	2	41	0	1	1	1	0	0
0	0	0	0	2	1	0	2	31	0	1	1	1	0	0
0	0	0	1	2	1	0	1	50	1	9	3	1	1
1	1		1	2	0	0	1	29	1	1	1	1	0	0
0	0	0	1	2	0	0	1	34	1	4	1	0	0	0
0	0	0	0	2	1	0	1	34	1	9	3	1	1
0	0	0	0	3	1	0	1	27	1	1	2	1		1
1		1	0	2	1	0	2	123	1	1	2	1		1
0	0	0	0	1	1	1	2	162	0	1	2	1		1
1		1	0	2	0	1	2	36	1	1	3	1	1
0	0	0	0	1	0	0	1	58	0	9	3	0	1
1	1		1	2	1	0	1	127	1	3	3	1	1
0	0	0	0	3	0	0	1	55	0	9	2	0		1
0	0	0	1	2	0	0	1	22	0	4	3	1	1
0	0	0	0	2	1	0	2	75	1	1	2	0		1
1	1		0	3	1	1	2	57	1	1	1	1	0	0
1		1	0	2	0	0	2	131	1	1	2	0		1
0	0	0	0	3	1	0	1	108	1	2	2	1		1
0	0	0	1	2	0	0	1	NA	0	4	1	0
0	0	0	0	2	0	1	1	NA	0	2	2	1
1		1	0	2	1	0	2	62	1	1	2	1		1
0	0	0	0	3	1	0	1	98	1	2	3	1	1
1	1		0	2	0	0	2	445	1	1	3	0	1
0	0	0	1	1	0	0	1	25	1	1	1	1	0	0
0	0	0	1	2	1	0	1	26	1	3	3	0	1
0	0	0	1	2	1	0	2	33	1	1	1	1	0	0
0	0	0	0	2	0	1	1	43	1	9	2	1		1
1	1		0	2	0	0	1	156	1	1	1	0	0	0
1	1		1	2	1	0	2	700	1	3	2	1		1
0	0	0	1	3	1	1	1	54	1	9	1	1	0	0
1	1		1	2	0	1	1	31	0	4	1	1	0	0
1	1		0	2	0	0	2	120	0	1	1	1	0	0
0	0	0	1	1	0	0	1	58	0	4	1	1	0	0
0	0	0	1	3	0	0	1	16	1	4	1	1	0	0
0	0	0	0	3	0	0	1	14	1	2	3	1	1
0	0	0	1	1	0	0	1	98	1	3	2	1		1
